# Supplementary material
Source: publisher figshare collection journal article supplement (https://karger.figshare.com/ndownloader/files/38288496)
Supplement: Supplementary file 1 [file 38288496]

**Supplemental Figure 3.** Effect of thiazide prescription on urine calcium

**
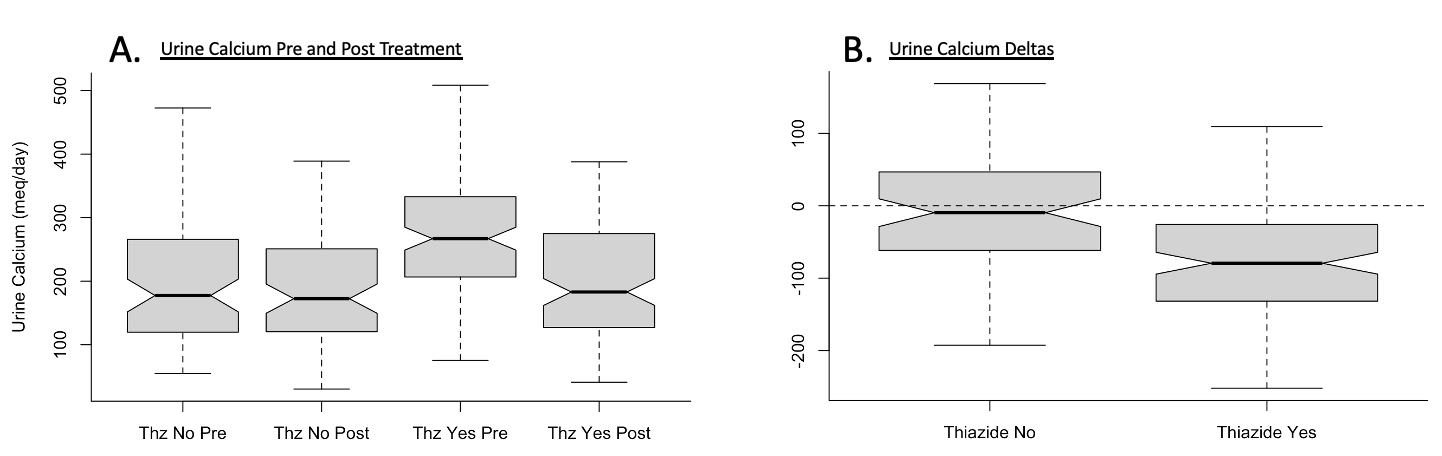
**

**Abbreviations:** Thz, thiazide

**Panel A**: P value comparing No Advice Pre to Advice Pre <0.001, p value comparing Advice Pre to Advice Post <0.001. **Panel B**: p value comparing Advice to No Advice <0.001.
